# Supplementary material for: Complete Genome Sequence of the Model Halovirus PhiH1 (ΦH1)
Source: MDPI journal article supplement (doi:10.3390/genes9100493), 2018-10-12

Supplementary Materials

Figure S1.

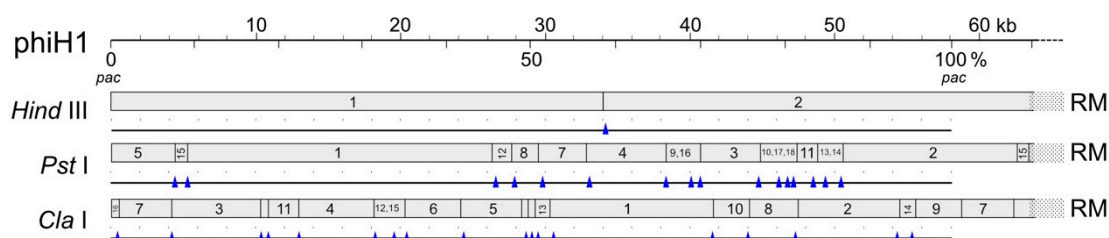

**Figure S1.** Original phiH1 restriction map compared to *in silico* map determined from the genome sequence. The published phiH1 restriction map (RM), modified from Figure 4 of [1], is compared to an *in silico* map based on the complete genome sequence. The top scale and grey-shaded bars are traced reproductions of the original viral DNA restriction maps, including the fragment numbers [1]. Below each of these are the corresponding *in silico* restriction maps (black lines, blue triangles), determined from the complete genome sequence. Underneath each of these are tick marks every 2 kb. Enzyme names are shown at the left, and *pac* sites indicated at the 0 and 100% marks. Maps extend beyond 100% to indicate the terminal redundancy and circularly-permuted nature of the virion DNA. A distinct subpopulation of virus particles contain genomes starting at the *pac* site, which leads to faint but readily detectable restriction fragments assigned to equivalent genome positions (e.g. fragments 5 and 2 for PstI, or fragments 16 and 9 for ClaI).

Reference

1. Schnabel, H.; Schramm, E.; Schnabel, R.; Zillig, W. Structural variability in the genome of phage ΦH of *Halobacterium halobium*. *Mol. Gen. Genet.* 1982, 188, 370-377.

Figure S2.

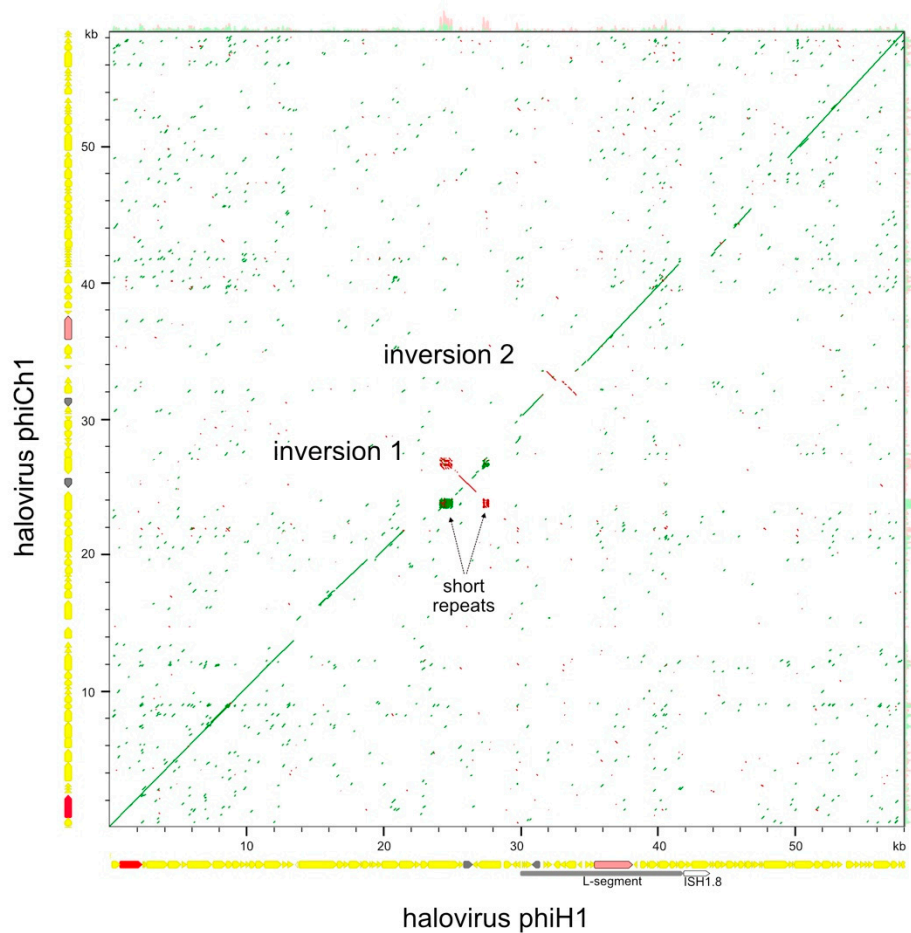

**Figure S2.** Dot plot sequence comparison of phiH1 and phiCh1 genomes. Genomes were aligned using the YASS aligner (<http://bioinfo.lifl.fr/yass/>). Alignment in forward direction is green, and in reverse direction is red. Along the axes are arrows representing coding sequences, with terminase genes (*terL*) coloured red, integrase/recombinase genes in grey, and repH genes in pink. The short repeats within inversion 1 result in high-enough DNA similarity to be detected in both orientations.

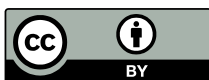

Supplement: s1 [file s1]
